# Supplementary material for: High AGR2 protein is a feature of low grade endometrial cancer cells
Source: PubMed Central journal article supplement (PMC6101135; doi:10.18632/oncotarget.25838), 2018-07-31
Supplement: oncotarget-09-31459-s001.pdf [file oncotarget-09-31459-s001.pdf]

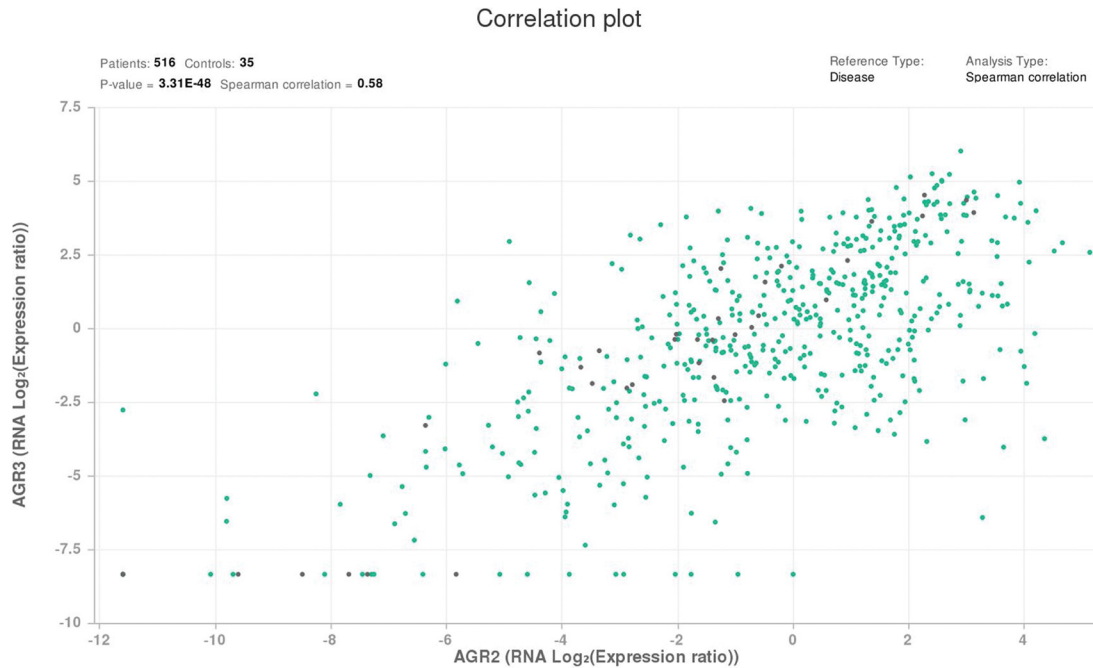

**Supplementary Figure 3: Correlation of *AGR2* and *AGR3* RNA expression in TCGA cohort of uterine cancer samples.** TCGA uterine cancer samples had RNA expression data for *AGR2* and *AGR3* in 516 endometrial cancer samples (green dots) and 35 control (black dots). The analysis demonstrated a significant positive correlation between the two genes ( $r = 0.58$ ,  $p = 3.31E-48$ ).

## Gene-Bioset Correlations for *AGR2*

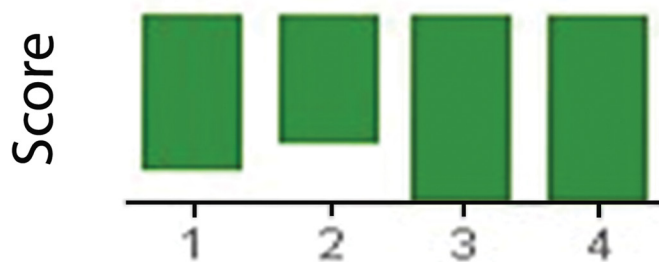

**Supplementary Figure 4: External validation with 3 published EC microarray datasets.** *AGR2* gene expression in 3 independent sample sets, using Illumina's BaseSpace Correlation Engine application (software; <https://www.illumina.com/informatics/research/biological-data-interpretation/nextbio.html>; Illumina, San Diego, CA, USA) to include 126 grade 1 endometrioid cancers, and 131 grade 3 endometrioid and serous EC from the following publically available microarray datasets; (1) GSE17025, 26 grade 3 versus 30 grade 1 endometrioid, (2); GSE24537, 11 serous versus 11 grade 1 (3); GSE2109, 31 grade 3 versus 22 grade 1 endometrioid, (4); GSE2109, 63 endometrioid grade 3 versus 22 endometrioid grade 1. The height of each vertical bar in the score matrix graph represents the score of the correlation between the analysed biosets and the *AGR2* gene. The correlation's score is based on the significance of the measurement made for the *AGR2* gene in the biosets analysed. The bar is green and appears below the midline depicting the *AGR2* gene was significantly down-regulated or deleted in in grade 3 and serous ECs compared with grade 1 ECs.

**Supplementary Table 1: Primary antibodies and their immunohistochemistry conditions**

| Primary     | Type       | Clone   | Supplier             | HIAR* | Dilution | Incubation conditions |           |
|-------------|------------|---------|----------------------|-------|----------|-----------------------|-----------|
| Ab          |            |         |                      | (min) |          | Time (hour)           | Temp (°C) |
| AGR2        | Monoclonal | EPR3278 | Abcam <sup>2</sup>   | 2     | 1:1500   | 20                    | 4         |
| AR          | Monoclonal | 441     | DAKO <sup>1</sup>    | 2     | 1:50     | 20                    | 4         |
| PR          | Monoclonal | PgR 636 | DAKO                 | 2     | 1:1000   | 1                     | 18        |
| ER $\alpha$ | Polyclonal |         | Abcam <sup>2</sup>   | 2     | 1:50     | 2                     | 18        |
| ER $\beta$  | Monoclonal | PPG5/10 | Serotec <sup>3</sup> | 2     | 1:50     | 20                    | 4         |
| Ki67        | Monoclonal | MM1     | Leica <sup>4</sup>   | 4     | 1:200    | 20                    | 4         |

\*Heat induced antigen retrieval by pressure cooking in citrate buffer pH 6 (Hapangama *et al*, 2012). <sup>1</sup>Ely, Cambridgeshire, UK; <sup>2</sup>Cambridge, UK; <sup>3</sup>Oxford, UK; <sup>4</sup>Newcastle upon Tyne, UK; Dorset, UK.

**Supplementary Table 2: Genes that perturb *AGR2* when mutated or knocked down.** The genes that influence *AGR2* expression when either mutated or knocked down were examined with Illumina's BaseSpace Knockout atlas application (software;<https://www.illumina.com/informatics/research/biological-data-interpretation/nextbio.html>; Illumina, San Diego, CA, USA). See Supplementary\_Table\_2
